# Supplementary material
Source: PubMed Central journal article supplement (PMC1480434)
Supplement: pnas_0603597103_1.pdf [file pnas_0603597103_1.pdf]

**Table 1. Nucleotide sequences of 5' leaders used in shunting experiments**

| 5' Leader | Description                                                                                                                                                                                                                                                                                                                                                                                                                                                                                                                                                                                                                                                                     |
|-----------|---------------------------------------------------------------------------------------------------------------------------------------------------------------------------------------------------------------------------------------------------------------------------------------------------------------------------------------------------------------------------------------------------------------------------------------------------------------------------------------------------------------------------------------------------------------------------------------------------------------------------------------------------------------------------------|
| p1-uAUG   | <p>Five repeats of the 9-nt poly(A) spacer (SIII) interspersed with a 9-nt spacer based on a segment of the <math>\beta</math>-globin 5' UTR [nt 9-17 (SI)]. The sequence between the 4th and 5th (SI/SIII) repeat has been mutated at various nucleotides to A and is spaced 25-nt upstream of the <i>Photinus</i> initiator AUG with <math>\beta</math>-globin 5' UTR sequence. Cloned into the mammalian expression vector pGL3c.</p> <p><i>TTCTGACAT AAAAAAAAAA TTCTGACAT AAAAAAAAAA TTCTGACAT AAAAAAAAAA</i><br/> <i>TTCTGACAT AAAAAAAAAA TTCTGACAT CACCAAAAGA TTCTGACAT AAAAAAAAAA</i><br/> <i>GACTCACAACCCAGAAACAGACAT</i></p>                                           |
| p1+uAUG   | <p>Five repeats of the 9-nt poly(A) spacer (SIII) interspersed with a 9-nt spacer based on a segment of the <math>\beta</math>-globin 5' UTR [nt 9-17(SI)]. The sequence between the 4th and 5th (SI/SIII) repeat has been mutated at various nucleotides to introduce an upstream AUG in optimal context and is spaced 25-nt upstream of the <i>Photinus</i> initiator AUG with <math>\beta</math>-globin 5' UTR sequence. Cloned into the mammalian expression vector pGL3c.</p> <p><i>TTCTGACAT AAAAAAAAAA TTCTGACAT AAAAAAAAAA TTCTGACAT AAAAAAAAAA</i><br/> <i>TTCTGACAT AAAAAAAAAA TTCTGACAT CACCATGGA TTCTGACAT AAAAAAAAAA</i><br/> <i>GACTCACAACCCAGAAACAGACAT</i></p>  |
| p2-uAUG   | <p>Four repeats of the 8-nt <i>Gtx</i> TEE and a 9-nt poly(A) spacer (SIII) interspersed with a 9-nt spacer based on a segment of the <math>\beta</math>-globin 5' UTR [nt 9-17 (SI)]. The spacer sequence between the 4th <i>Gtx</i> TEE and the (SI/III) spacer has been mutated at various nucleotides to A and is spaced 25-nt upstream of the <i>Photinus</i> initiator AUG with <math>\beta</math>-globin 5' UTR sequence. Cloned into the mammalian expression vector pGL3c.</p> <p><i>TTCTGACAT CCGGCGGGA TTCTGACAT CCGGCGGGA TTCTGACAT CCGGCGGGA</i><br/> <i>TTCTGACAT CCGGCGGGA TTCTGACAT CACCAAAGA TTCTGACAT AAAAAAAAAA</i><br/> <i>GACTCACAACCCAGAAACAGACAT</i></p> |
| p3-uAUG   | <p>Five repeats of the 8-nt <i>Gtx</i> TEE interspersed with a 9-nt spacer based on a segment of the <math>\beta</math>-globin 5' UTR [nt 9-17 (SI)]. The spacer sequence between 4th and 5th <i>Gtx</i> TEE has been mutated at various nucleotides to A and is spaced 25-nt upstream of the <i>Photinus</i> initiator AUG with <math>\beta</math>-</p>                                                                                                                                                                                                                                                                                                                        |

| 5' Leader | Description                                                                                                                                                                                                                                                                                                                                                                                                                                                                                                                                                                                                                                                                                                                |
|-----------|----------------------------------------------------------------------------------------------------------------------------------------------------------------------------------------------------------------------------------------------------------------------------------------------------------------------------------------------------------------------------------------------------------------------------------------------------------------------------------------------------------------------------------------------------------------------------------------------------------------------------------------------------------------------------------------------------------------------------|
|           | <p>globin 5' UTR sequence. Cloned into the mammalian expression vector pGL3c.</p> <p><i>TTCTGACAT CCGGCGGGA TTCTGACAT CCGGCGGGA TTCTGACAT CCGGCGGGA</i><br/> <i>TTCTGACAT CCGGCGGGA TTCTGACAT CACCAAAGA TTCTGACAT CCGGCGGGA</i><br/> <i>GACTCACAACCCAGAAACAGACAT</i></p>                                                                                                                                                                                                                                                                                                                                                                                                                                                   |
| p3+uAUG   | <p>Five repeats of the 8-nt <i>Gtx</i> TEE interspersed with a 9-nt spacer based on a segment of the <math>\beta</math>-globin 5' UTR [nt 9-17 (SI)]. The spacer sequence between 4th and 5th <i>Gtx</i> TEE has been mutated at various nucleotides to introduce an upstream AUG in optimal context and is spaced 25-nt upstream of the <i>Photinus</i> initiator AUG with <math>\beta</math>-globin 5' UTR sequence. Cloned into the mammalian expression vector pGL3c.</p> <p><i>TTCTGACAT CCGGCGGGA TTCTGACAT CCGGCGGGA TTCTGACAT CCGGCGGGA</i><br/> <i>TTCTGACAT CCGGCGGGA TTCTGACAT CACCATGGA TTCTGACAT CCGGCGGGA</i><br/> <i>GACTCACAACCCAGAAACAGACAT</i></p>                                                       |
| p4+uAUG   | <p>Four repeats of the 9-nt poly(A) spacer (SIII) and an 8-nt <i>Gtx</i> TEE interspersed with a 9-nt spacer based on a segment of the <math>\beta</math>-globin 5' UTR [nt 9-17 (SI)]. The spacer sequence between the 4th (SIII) and the 8-nt <i>Gtx</i> TEE has been mutated at various nucleotides to introduce an upstream AUG in optimal context and is spaced 25-nt upstream of the <i>Photinus</i> initiator AUG with <math>\beta</math>-globin 5' UTR sequence. Cloned into the mammalian expression vector pGL3c.</p> <p><i>TTCTGACAT AAAAAAAAAA TTCTGACAT AAAAAAAAAA TTCTGACAT AAAAAAAAAA</i><br/> <i>TTCTGACAT AAAAAAAAAA TTCTGACAT CACCATGGA TTCTGACAT CCGGCGGGA</i><br/> <i>GACTCACAACCCAGAAACAGACAT</i></p> |
| p5+uAUG   | <p>Five repeats of the 8-nt <i>Gtx</i> TEE interspersed with a 9-nt spacer based on a segment of the <math>\beta</math>-globin 5' UTR [nt 9-17 (SI)]. The spacer sequence between 4th and 5th <i>Gtx</i> TEE has been mutated at various nucleotides to introduce an upstream AUG in optimal context and is in frame with the main <i>Photinus</i> luciferase reading frame by the introduction of an A into a 25-nt spacer sequence comprised of <math>\beta</math>-globin 5' UTR sequence indicated by an *. Cloned into the mammalian expression vector pGL3c.</p> <p><i>TTCTGACAT CCGGCGGGA TTCTGACAT CCGGCGGGA TTCTGACAT CCGGCGGGA</i></p>                                                                            |

| 5' Leader | Description                                                                                                                                                                                                                                                                                                                                                                                                                                                                                                                                                                                                                                                                                                                                                                                                                                                                                                                                                              |
|-----------|--------------------------------------------------------------------------------------------------------------------------------------------------------------------------------------------------------------------------------------------------------------------------------------------------------------------------------------------------------------------------------------------------------------------------------------------------------------------------------------------------------------------------------------------------------------------------------------------------------------------------------------------------------------------------------------------------------------------------------------------------------------------------------------------------------------------------------------------------------------------------------------------------------------------------------------------------------------------------|
|           | <p><i>TTCTGACAT CCGGCGGGA TTCTGACAT CACCATGGA TTCTGACAT CCGGCGGGA GACTCACAACCCCAA*GAAACAGACAT</i></p>                                                                                                                                                                                                                                                                                                                                                                                                                                                                                                                                                                                                                                                                                                                                                                                                                                                                    |
| p1hp      | <p>Five repeats of the 9-nt poly(A) spacer (SIII) interspersed with a 9-nt spacer based on a segment of the <math>\beta</math>-globin 5' UTR [nt 9-17 (SI)] upstream of a 128-nt hairpin structure (underlined) with a predicted energy of <math>-126.1</math> kcal/mol. An (SI/SIII) repeat is located downstream of the hairpin structure and is spaced 25-nt upstream of the <i>Photinus</i> initiator AUG with <math>\beta</math>-globin 5' UTR sequence. Cloning into the pGL3c mammalian expression vector generates an <i>MfeI/EcoRI</i> junction (CAATTC) and a unique <i>AatII</i> restriction site in the loop of the hairpin.</p> <p><i>AAAAAAAAA TTCTGACAT AAAAAAAAAA TTCTGACAT AAAAAAAAAA TTCTGACAT AAAAAAAAAA TTCTGACAT AAAAAAAAAA TTCTGACA CAATTC <u>CCAGCGTAATCGGG AACGTCGTAGGGGTAAGCCATTGTACGACCACCGGCTCGAGGGGCC</u> GACGTC <u>GGGCCCTCGAGCCGGTGGTTCGTACAATGGCTTACCCCTACGACGTTCCCGATTACGC TGG</u> TTCTGACAT AAAAAAAAAA GACTCACAACCCAGAAACAGACAT</i></p> |
| p2hp      | <p>Five repeats of the 8-nt <i>Gtx</i> TEE interspersed with a 9-nt spacer based on a segment of the <math>\beta</math>-globin 5' UTR [nt 9-17 (SI)] upstream of a 128-nt hairpin structure (underlined) with a predicted energy of <math>-126.1</math> kcal/mol. An (SI)/poly(A) repeat is located downstream of the hairpin structure and are spaced 25-nt upstream of the <i>Photinus</i> initiator AUG with <math>\beta</math>-globin 5' UTR sequence. Cloning into the pGL3c mammalian expression vector generates an <i>MfeI/EcoRI</i> junction (CAATTC) and a unique <i>AatII</i> restriction site in the loop of the hairpin.</p> <p><i>CCGGCGGGA TTCTGACAT CCGGCGGGA TTCTGACAT CCGGCGGGA TTCTGACAT CCGGCGGGA TTCTGACAT CCGGCGGGA TTCTGACAT CAATTC <u>CCAGCGTAATCGG GAACGTCGTAGGGGTAAGCCATTGTACGACCACCGGCTCGAGGGGCC</u> GACGTC <u>GGGCCCTCGAGCCGGTGGTTCGTACAATGGCTTACCCCTACGACGTTCCCGATTACGC TGG</u> TTCTGACAT AAAAAAAAAA GACTCACAACCCAGAAACAGACAT</i></p>       |
| p3hp      | <p>Five repeats of the 9-nt poly(A) spacer (SIII) interspersed with a 9-nt spacer based on a segment of the <math>\beta</math>-globin 5' UTR [nt 9-17 (SI)] upstream of a 128-nt hairpin structure (underlined) with a predicted energy of <math>-126.1</math> kcal/mol. An (SI) spacer and a single copy of the 8-nt <i>Gtx</i> TEE are located downstream of the hairpin structure and are spaced 25-nt upstream of the <i>Photinus</i> initiator AUG with <math>\beta</math>-globin 5' UTR sequence. Cloning into the pGL3c mammalian expression vector generates an <i>MfeI/EcoRI</i> junction (CAATTC) and a unique <i>AatII</i> restriction site in the</p>                                                                                                                                                                                                                                                                                                        |

| 5' Leader | Description                                                                                                                                                                                                                                                                                                                                                                                                                                                                                                                                                                                                                                                                                                                                                                                                                                                                                                                                                                                                             |
|-----------|-------------------------------------------------------------------------------------------------------------------------------------------------------------------------------------------------------------------------------------------------------------------------------------------------------------------------------------------------------------------------------------------------------------------------------------------------------------------------------------------------------------------------------------------------------------------------------------------------------------------------------------------------------------------------------------------------------------------------------------------------------------------------------------------------------------------------------------------------------------------------------------------------------------------------------------------------------------------------------------------------------------------------|
|           | <p>loop of the hairpin.</p> <p><b>CCGGCGGGA TTCTGACAT CCGGCGGGA TTCTGACAT CCGGCGGGA TTCTGACAT</b><br/> <b>CCGGCGGGA TTCTGACAT CCGGCGGGA TTCTGACAT CAATTC <u>CCAGCGTAATCGG</u></b><br/> <u>GAACGTCGTAGGGGTAAGCCATTGTACGACCACCGGCTCGAGGGGCCC GACGTC</u><br/> <u>GGGCCCCTCGAGCCGGTGGTTCGTACAATGGCTTACCCCTACGACGTTCCCGATTACGC</u><br/> <u>TGG TTCTGACAT CCGGCGGGA GACTCACAACCCAGAAACAGACAT</u></p>                                                                                                                                                                                                                                                                                                                                                                                                                                                                                                                                                                                                                          |
| p4hp      | <p>Five repeats of the 9-nt poly(A) spacer(SIII) interspersed with a 9-nt spacer based on a segment of the <math>\beta</math>-globin 5' UTR [nt 9-17 (SI)] upstream of a 128-nt hairpin structure (underlined) with a predicted of <math>-126.1</math> kcal/mol. An (SI) spacer and a single copy of the 8-nt <i>Gtx</i> TEE are located downstream of the hairpin structure and are spaced 25-nt upstream of the <i>Photinus</i> initiator AUG with <math>\beta</math>-globin 5' UTR sequence. Cloning into the pGL3c mammalian expression vector generates an MfeI/EcoRI junction (CAATTC) and a unique AatII restriction site in the loop of the hairpin.</p> <p>AAAAAAAAA TTCTGACAT AAAAAAAAAA TTCTGACAT AAAAAAAAAA TTCTGACAT<br/> AAAAAAAAA TTCTGACAT AAAAAAAAAA TTCTGACA CAATTC <u>CCAGCGTAATCGGG</u><br/> <u>AACGTCGTAGGGGTAAGCCATTGTACGACCACCGGCTCGAGGGGCCC GACGTC</u><br/> <u>GGGCCCCTCGAGCCGGTGGTTCGTACAATGGCTTACCCCTACGACGTTCCCGATTACGC</u><br/> <u>TGG TTCTGACAT CCGGCGGGA GACTCACAACCCAGAAACAGACAT</u></p> |
| p5hp      | <p>Five repeats of the 9-nt poly(A) spacer (SIII) interspersed with a 9-nt spacer based on a segment of the <math>\beta</math>-globin 5' UTR [nt 9-17 (SI)] upstream of a 128-nt hairpin structure (underlined) with a predicted energy of <math>-126.1</math> kcal/mol. An (SI/SIII) spacer is located downstream of the hairpin structure and are spaced 25-nt upstream of the <i>Photinus</i> initiator AUG with <math>\beta</math>-globin 5' UTR sequence. Cloning into the pYESFFlucH yeast expression vector generates an MfeI/EcoRI junction (CAATTC) and a unique AatII restriction site in the loop of the hairpin.</p> <p>AAAAAAAAA TTCTGACAT AAAAAAAAAA TTCTGACAT AAAAAAAAAA TTCTGACAT<br/> AAAAAAAAA TTCTGACAT AAAAAAAAAA TTCTGACA CAATTC <u>CCAGCGTAATCGGG</u><br/> <u>AACGTCGTAGGGGTAAGCCATTGTACGACCACCGGCTCGAGGGGCCC GACGTC</u><br/> <u>GGGCCCCTCGAGCCGGTGGTTCGTACAATGGCTTACCCCTACGACGTTCCCGATTACGC</u><br/> <u>TGG TTCTGACAT AAAAAAAAAA GACTCACAACCCAGAAACAGACAT</u></p>                                |

| 5' Leader | Description                                                                                                                                                                                                                                                                                                                                                                                                                                                                                                                                                                                                                                                                                                                                                                                                                                                                                                                                                                      |
|-----------|----------------------------------------------------------------------------------------------------------------------------------------------------------------------------------------------------------------------------------------------------------------------------------------------------------------------------------------------------------------------------------------------------------------------------------------------------------------------------------------------------------------------------------------------------------------------------------------------------------------------------------------------------------------------------------------------------------------------------------------------------------------------------------------------------------------------------------------------------------------------------------------------------------------------------------------------------------------------------------|
| p6hp      | <p>Five repeats of the 8-nt <i>Gtx</i> TEE interspersed with a 9-nt spacer based on a segment of the <math>\beta</math>-globin 5' UTR [nt 9-17 (SI)] upstream of a 128-nt hairpin structure (underlined) with a predicted energy of <math>-126.1</math> kcal/mol. An (SI) poly(A) spacer is located downstream of the hairpin structure and are spaced 25-nt upstream of the <i>Photinus</i> initiator AUG with <math>\beta</math>-globin 5' UTR sequence. Cloning into the pYESFFlucH yeast expression vector generates a unique AatII restriction site in the loop of the hairpin and an EcoRI restriction site.</p> <p><b>CCGGCGGGA TTCTGACAT CCGGCGGGA TTCTGACAT CCGGCGGGA TTCTGACAT CCGGCGGGA TTCTGACAT CCGGCGGGA TTCTGACAT GAATTC <u>CCAGCGTAATCGG</u> GAACGTCGTAGGGGTAAGCCATTGTACGACCACCGGCTCGAGGGGGCCC GACGTC GGGCCCCTCGAGCCGGTGGTTCGTACAATGGCTTACCCCTACGACGTTCCCGATTACGC TGG TTCTGACAT AAAAAAAAAA GACTCACAACCCAGAAACAGACAT</b></p>                                      |
| p7hp      | <p>Five repeats of the 8-nt <i>Gtx</i>-TEE interspersed with a 9-nt spacer based on a segment of the <math>\beta</math>-globin 5' UTR [nt 9-17 (SI)] upstream of a 128-nt hairpin structure (underlined) with a predicted energy of <math>-126.1</math> kcal/mol. An (SI) spacer and a single copy of the 8-nt <i>Gtx</i> TEE are located downstream of the hairpin structure and are spaced 25-nt upstream of the <i>Photinus</i> initiator AUG with <math>\beta</math>-globin 5' UTR sequence. Cloning into the pYESFFlucH yeast expression vector generates a unique AatII restriction site in the loop of the hairpin and an EcoRI restriction site.</p> <p><b>CCGGCGGGA TTCTGACAT CCGGCGGGA TTCTGACAT CCGGCGGGA TTCTGACAT CCGGCGGGA TTCTGACAT CCGGCGGGA TTCTGACAT GAATTC <u>CCAGCGTAATCGG</u> GAACGTCGTAGGGGTAAGCCATTGTACGACCACCGGCTCGAGGGGGCCC GACGTC GGGCCCCTCGAGCCGGTGGTTCGTACAATGGCTTACCCCTACGACGTTCCCGATTACGC TGG TTCTGACAT CCGGCGGGA GACTCACAACCCAGAAACAGACAT</b></p> |
| p8hp      | <p>Five repeats of the 9-nt poly(A) spacer (SIII) interspersed with a 9-nt spacer based on a segment of the <math>\beta</math>-globin 5' UTR [nt 9-17 (SI)] upstream of a 128-nt hairpin structure (underlined) with a predicted energy of <math>-126.1</math> kcal/mol. An (SI) spacer and a single copy of the 8-nt <i>Gtx</i> TEE are located downstream of the hairpin structure and are spaced 25-nt upstream of the <i>Photinus</i> initiator AUG with <math>\beta</math>-globin 5' UTR sequence. Cloning into the pYESFFlucH yeast expression vector generates an MfeI/EcoRI junction (CAATTC) and a unique AatII restriction site in the loop of the hairpin.</p>                                                                                                                                                                                                                                                                                                        |

| 5' Leader | Description                                                                                                                                                                                                                                                                                                                                                                                                                                                                                                                                                                                                                                                                                                                                                                                                                                                                                                                                                                                                                                                                                                                                                                    |
|-----------|--------------------------------------------------------------------------------------------------------------------------------------------------------------------------------------------------------------------------------------------------------------------------------------------------------------------------------------------------------------------------------------------------------------------------------------------------------------------------------------------------------------------------------------------------------------------------------------------------------------------------------------------------------------------------------------------------------------------------------------------------------------------------------------------------------------------------------------------------------------------------------------------------------------------------------------------------------------------------------------------------------------------------------------------------------------------------------------------------------------------------------------------------------------------------------|
|           | <p>AAAAAAAAA <i>TTCTGACAT</i> AAAAAAAAAA <i>TTCTGACAT</i> AAAAAAAAAA <i>TTCTGACAT</i><br/> AAAAAAAAA <i>TTCTGACAT</i> AAAAAAAAAA <i>TTCTGACAT</i> CAATTC <u>CCAGCGTAATCGGG</u><br/> <u>AACGTCGTAGGGGTAAGCCATTGTACGACCACCGGCTCGAGGGGCCC</u> GACGTC<br/> <u>GGGCCCTCGAGCCGGTGGTCGTACAATGGCTTACCCCTACGACGTTCCCGATTACGC</u><br/> <u>TGG</u> <i>TTCTGACAT</i> <b>CCGGCGGGA</b> <i>GA</i>CTCACAACCCAGAAACAGACAT</p>                                                                                                                                                                                                                                                                                                                                                                                                                                                                                                                                                                                                                                                                                                                                                                  |
| p9hp      | <p>Five repeats of the 8-nt <i>Gtx</i> TEE containing a <i>GfC</i> mutation previously shown to eliminate its ability to enhance translation (1)<sup>1</sup> interspersed with a 9-nt spacer based on a segment of the <math>\beta</math>-globin 5' UTR [nt 9-17 (SI)] upstream of a 128-nt hairpin structure (underlined) with a predicted energy of -126.1 kcal/mol. An (SI) poly(A) spacer is located downstream of the hairpin structure and are spaced 25-nt upstream of the <i>Photinus</i> initiator AUG with <math>\beta</math>-globin 5' UTR sequence. Cloning into the pYESFFlucH yeast expression vector generates an MfeI/EcoRI junction (CAATTC) and a unique AatII restriction site in the loop of the hairpin.</p> <p><b>CCC*GCGGGA</b> <i>TTCTGACAT</i> <b>CCC*GCGGGA</b> <i>TTCTGACAT</i> <b>CCC*GCGGGA</b> <i>TTCTGACAT</i><br/> <b>CCC*GCGGGA</b> <i>TTCTGACAT</i> <b>CCC*GCGGGA</b> <i>TTCTGACAT</i> CAATTC <u>CCAGCGTAAT</u><br/> <u>CGGGAACGTCGTAGGGGTAAGCCATTGTACGACCACCGGCTCGAGGGGCCC</u><br/> GACGTC <u>GGGCCCTCGAGCCGGTGGTCGTACAATGGCTTACCCCTACGACGTTCCC</u><br/> <u>GATTACGCTGG</u> <i>TTCTGACAT</i> AAAAAAAAAA <i>GA</i>CTCACAACCCAGAAACAGACAT</p> |
| p10hp     | <p>Five repeats of the 8-nt <i>Gtx</i> TEE containing a <i>GfC</i> mutation previously shown to eliminate its ability to enhance translation (1) interspersed with a 9-nt spacer based on a segment of the <math>\beta</math>-globin 5' UTR [nt 9-17 (SI)] upstream of a 128-nt hairpin structure (underlined) with a predicted energy of -126.1 kcal/mol. An (SI) spacer and a single copy of the mutated 8-nt <i>Gtx</i> TEE are located downstream of the hairpin structure and are spaced 25-nt upstream of the <i>Photinus</i> initiator AUG with <math>\beta</math>-globin 5' UTR sequence. Cloning into the pYESFFlucH yeast expression vector generates an MfeI/EcoRI junction (CAATTC) and a unique AatII restriction site in the loop of the hairpin.</p> <p><b>CCC*GCGGGA</b> <i>TTCTGACAT</i> <b>CCC*GCGGGA</b> <i>TTCTGACAT</i> <b>CCC*GCGGGA</b> <i>TTCTGACAT</i><br/> <b>CCC*GCGGGA</b> <i>TTCTGACAT</i> <b>CCC*GCGGGA</b> <i>TTCTGACAT</i> CAATTC <u>CCAGCGTAAT</u><br/> <u>CGGGAACGTCGTAGGGGTAAGCCATTGTACGACCACCGGCTCGAGGGGCCC</u><br/> GACGTC <u>GGGCCCTCGAGCCGGTGGTCGTACAATGGCTTACCCCTACGACGTTCCC</u></p>                                                   |

<sup>1</sup> Please confirm or correct the addition of ref. 1.

| 5' Leader | Description                                                                                                                                                                                                                                                                                                                                                                                                                                                                                                                                                                                                                                                                                                                                                                                                                                                                                                                                                                                                                                                                                                                                                                                   |
|-----------|-----------------------------------------------------------------------------------------------------------------------------------------------------------------------------------------------------------------------------------------------------------------------------------------------------------------------------------------------------------------------------------------------------------------------------------------------------------------------------------------------------------------------------------------------------------------------------------------------------------------------------------------------------------------------------------------------------------------------------------------------------------------------------------------------------------------------------------------------------------------------------------------------------------------------------------------------------------------------------------------------------------------------------------------------------------------------------------------------------------------------------------------------------------------------------------------------|
|           | <u>GATTACGCTGG</u> <i>TTCTGACAT</i> <b>CCC*GCGGGA</b> <i>GACTCACAACCCCAGAAACAGACAT</i>                                                                                                                                                                                                                                                                                                                                                                                                                                                                                                                                                                                                                                                                                                                                                                                                                                                                                                                                                                                                                                                                                                        |
| p11hp     | <p>Five repeats of the 9-nt poly(A) spacer (SIII) interspersed with a 9-nt spacer based on a segment of the <math>\beta</math>-globin 5' UTR [nt 9-17 (SI)] upstream of a 128-nt hairpin structure (underlined) with a predicted energy of <math>-126.1</math> kcal/mol. An (SI) spacer and a single copy of the mutated 8-nt <i>Gtx</i> TEE previously shown to eliminate its ability to enhance translation (1) are located downstream of the hairpin structure and are spaced 25-nt upstream of the <i>Photinus</i> initiator AUG with <math>\beta</math>-globin 5' UTR sequence. Cloning into the pYESFFlucH yeast expression vector generates an MfeI/EcoRI junction (CAATTC) and a unique AatII restriction site in the loop of the hairpin.</p> <p>           AAAAAAAAAA <i>TTCTGACAT</i> AAAAAAAAAA <i>TTCTGACAT</i> AAAAAAAAAA <i>TTCTGACAT</i><br/>           AAAAAAAAAA <i>TTCTGACAT</i> AAAAAAAAAA <i>TTCTGACAT</i> CAATTC <u>CCAGCGTAATCGG</u><br/> <u>GAACGTCGTAGGGGTAAGCCATTGTACGACCACCGGCTCGAGGGGCC</u> GACGTC<br/> <u>GGGCCCTCGAGCCGGTGGTCGTACAATGGCTTACCCCTACGACGTTCCCGATTA</u><br/> <u>CGCTGG</u> <i>TTCTGACAT</i> <b>CCC*GCGGGA</b> <i>GACTCACAACCCCAGAAACAGACAT</i> </p> |

*Gtx* sequences are in boldface; spacer sequences based on  $\beta$ -globin 5' UTR are in italics.  $\beta$ -globin 5' UTR numbering based on GeneBank accession no. J00413 for mouse  $\beta$ -globin gene.

1. Dresios, J., Chappell, S. A., Zhou, W. & Mauro, V. P. (2006) *Nat. Struct. Mol. Biol.* **13**, 30-34
